# Supplementary material
Source: publisher site journal article supplement (https://www.dovepress.com/article/303641)
Supplement: Supplementary file 1 [file get_supplementary_file.php]

**Supplementary**

**Table S1: Univariate analysis of variables associated with recurrent ischemic stroke in all non-elderly adults (aged <60 years) after index ischemic stroke attack adjusted by diabetes status.**

|  | **Diabetics with IS recurrence**  N=96 (%) | **Diabetic without IS recurrence**  N=1480 (%) | **P value** | **Nondiabetic with IS recurrence**  N=69 (%) | **Nondiabetic without IS recurrence**  N=1741 (%) | **P value** |
| --- | --- | --- | --- | --- | --- | --- |
| **Death** | 12 (12.5) | 102 (6.9) | 0.04 | 8 (11.6) | 87 (5.0) | 0.016 |
| **Age** |  |  |  |  |  |  |
| - **< 49 years** | 27 (28.1) | 340 (23.0) | 0.262 | 29 (42.0) | 626 (36.0) | 0.309 |
| - **49 to <60 years** | 69 (71.9) | 1139 (77.0) |  | 40 (58.0) | 1115 (64.0) |  |
| **Female** | 46 (47.9) | 785 (53.0) | 0.33 | 49 (71.0) | 1115 (64.0) | 0.236 |
| **BMI, Mean (±SD)** | 28.03 (±5.94) | 28.52 (±5.97) | 0.442 | 29.92 (±6.17) | 29.68 (±6.041) | 0.748 |
| **Blood glucose (mmol/L), Mean(±SD)** | 9.58 (±4.29) | 10.14 (±4.88) | 0.271 | 7.24 (±3.11) | 7.26 (±3.42) | 0.969 |
| **FHOS** | 7 (7.3) | 91 (6.1) | 0.653 | 8 (11.6) | 154 (8.8) | 0.433 |
| **Obesity** | 35 (36.5) | 616 (41.6) | 0.319 | 42 (60.9) | 918 (52.7) | 0.184 |
| **HTN** | 81 (84.4) | 1218 (82.3) | 0.604 | 43 (62.3) | 916 (52.6) | 0.113 |
| **SBP, Mean(±SD)** | 172.74 (±34.60) | 164.80 (±32.24) | 0.021 | 172.59 (±38.64) | 163.78 (±34.54) | 0.039 |
| **SBP <160mmHg** | 38 (39.6) | 680 (45.9) | 0.246 | 30 (43.5) | 871 (50.0) | 0.326 |
| **SBP ≥ 160mmHg** | 58 (60.4) | 800 (54.1) |  | 39 (56.6) | 870 (50.0) |  |
| **DBP, Mean(±SD)** | 94.43 (±19.68) | 92.03 (±17.35) | 0.195 | 97.59 (±19.85) | 94.38 (±19.58) | 0.182 |
| **Duration of hypertension** |  |  | 0.001 |  |  | 0.06 |
| - **<1-5** | 48 (50.0) | 570 (38.5) |  | 28 (40.6) | 503 (28.9) |  |
| - **6-10** | 8 (8.3) | 188 (12.7) |  | 7 (10.1) | 127 (7.3) |  |
| - **>10** | 20 (20.8) | 177 (12.0) |  | 5 (7.2) | 82 (4.7) |  |
| - **Unknown** | 5 (5.2) | 283 (19.1) |  | 3 (4.3) | 204 (11.7) |  |
| **Smoking** | 59 (61.5) | 785 (53.0) | 0.109 | 42 (60.9) | 849 (48.8) | 0.049 |
| **Hyperlipidemia** | 38 (39.6) | 490 (33.1) | 0.193 | 24 (34.8) | 350 (20.1) | 0.003 |
| **IHD** | 26 (27.1) | 160 (10.8) | 0.000 | 12 (17.4) | 121 (7.0) | 0.001 |
| **Atrial fibrillation** | 1 (1.0) | 20 (1.4) | 0.790 | 2 (2.9) | 49 (2.8) | 0.967 |
| **Medication received prior to index IS event (at baseline)** |  |  |  |  |  |  |
| - Received ACEIs or ARBs at baseline* | 90 (93.8) | 1425 (96.3) | 0.212 | 64 (92.8) | 1682 (96.6) | 0.089 |
| - Received beta blocker at baseline* | 14 (14.6) | 221 (14.9) | 0.877 | 9 (13.0) | 135 (7.8) | 0.075 |
| - Received antiplatelet at baseline* | 32 (33.3) | 384 (25.9) | 0.112 | 8 (11.6) | 242 (13.9) | 0.478 |
| - Received anticoagulant at baseline* | 96 (100.0) | 1462 (98.8) | 0.621 | 2 (2.9) | 44 (2.5) | 0.694 |
| - Received diuretic at baseline* | 22 (22.9) | 179 (12.1) | 0.002 | 5 (7.2) | 97 (5.6) | 0.554 |
|  |  |  |  |  |  |  |
| - Received ADM at baseline* | 57 (59.4) | 734 (49.6) | 0.063 | - | - | - |
| - - Received insulin only | 12 (46.2) | 95 (43.6) | 0.837 | - | - | - |
| - - Received OHA only | 31 (44.3) | 513 (40.6) | 0.618 | - | - | - |
| - - Received combination of insulin and OHA | 14 (53.8) | 123 (56.4) | 0.837 | - | - | - |
| - Received anti-hyperlipidemia at baseline* | 41(42.7) | 510 (34.5) | 0.100 | 10 (14.5) | 269 (15.5) | 0.829 |
| - Received CCB at baseline* | 96 (100) | 1479 (99.9) | 1.000 | 69 (100.0) | 1738 (99.8) | 1.000 |
|  |  |  |  |  |  |  |
| **Sub analysis for medication received at baseline*** |  |  |  |  |  |  |
| - Received ACEIs or ARBs at baseline* but not received ACEIs or ARBs upon discharge** | 60 (62.5) | 949 (66.6) | 1.000 | 43 (67.2) | 1201 (71.4) | 0.483 |
| - Received beta blocker at baseline* but not received beta blocker upon discharge** | 9 (64.3) | 122 (55.2) | 0.587 | 5 (55.6) | 83 (61.5) | 0.736 |
| - Received antiplatelet at baseline* but not received antiplatelet upon discharge** | 2 (6.3) | 51 (13.3) | 0.405 | 0 (0) | 220 (90.9) | 1.000 |
| - Received anticoagulant at baseline* but not received anticoagulant upon discharge** | - | 13 (72.2) | - | 0 (0.0) | 18 (40.9) | 0.513 |
| - Received diuretic at baseline* but not received diuretic upon discharge** | 13 (59.1) | 124 (69.3) | 0.341 | 2 (40.0) | 74 (76.3) | 0.103 |
| - Received CCB at baseline* but not received CCB upon discharge** | 78 (81.3) | 1154 (78.0) | 0.524 | 57 (82.6) | 1454 (83.7) | 0.868 |
| - Received anti-hyperlipidemia at baseline* but not received anti-hyperlipidemia upon discharge** | 4 (9.8) | 66 (12.9) | 0.807 | 1 (10.0) | 26 (9.7) | 1.000 |
|  |  |  |  |  |  |  |
| Received ACEIs or ARBs upon discharge** | 35 (36.5) | 496 (33.5) | 0.554 | 24 (34.8) | 499 (28.7) | 0.271 |
| - Started ACEIs or ARBs after index IS attack (upon discharge**) | 5 (83.3) | 20 (36.4) | 0.038 | 3 (60.0) | 18 (30.5) | 0.320 |
| - Received ACEIs or ARBs both at baseline and upon discharge** | 30 (33.3) | 476 (33.4) | 1.000 | 21 (32.8) | 481 (28.6) | 0.483 |
| Received beta blocker upon discharge** | 9 (9.4) | 173 (11.7) | 0.492 | 10 (14.5) | 157 (9.0) | 0.132 |
| - Started beta blocker after index IS (upon discharge**) | 4 (4.9) | 74 (5.9) | 1.000 | 6 (10.0) | 105 (6.5) | 0.286 |
| - Received beta blocker both at baseline* and upon discharge** | 5 (35.7) | 99 (44.8) | 0.587 | 4 (44.4) | 52 (38.5) | 0.736 |
| Received antiplatelet upon discharge** | 94 (97.9) | 1250 (84.5) | 0.0000 | 63 (91.3) | 1477 (84.8) | 0.139 |
| - Started antiplatelet after index IS (upon discharge**) | 64 (100) | 917 (83.7) | 0.000 | 55 (90.2) | 1257 (83.9) | 0.215 |
| - Received antiplatelet both at baseline* and upon discharge** | 30 (93.8) | 333 (86.7) | 0.405 | 8 (100.0) | 220 (90.9) | 1.000 |
| Received anticoagulant upon discharge** | 7 (7.3) | 77 (5.2) | 0.348 | 6 (8.7) | 125 (7.2) | 0.633 |
| - Started anticoagulant after index IS (upon discharge**) | 7 (7.3) | 72 (4.9) | 0.330 | 4 (6.0) | 99 (5.8) | 1.000 |
| - Received anticoagulant both at baseline* and upon discharge** | - | 5 (27.8) | - | 2 (100.0) | 26 (59.1) | 0.513 |
| Received diuretics upon discharge** | 17 (17.7) | 104 (7.0) | 0.000 | 5 (7.2) | 60 (3.4) | 0.096 |
| - Started diuretics after index IS (upon discharge**) | 8 (10.8) | 49 (3.8) | 0.009 | 2 (3.1) | 37 (2.3) | 0.655 |
| - Received diuretics both at baseline* and upon discharge** | 9 (40.9) | 55 (30.7) | 0.342 | 3 (60.0) | 23 (23.7) | 0.103 |
| Received ADM upon discharge** | 77 (80.2) | 896 (60.5) | 0.000 | - | - | - |
| - Received insulin only | 18 (52.9) | 167 (56.0) | 0.856 | - | - | - |
| - Received OHA only | 43 (69.4) | 597 (50.5) | 0.004 | - | - | - |
| - Received combination of insulin and OHA | 16 (47.1) | 131 (44.0) | 0.856 | - | - | - |
| Received anti-hyperlipidemia upon discharge** | 83 (86.5) | 1239 (83.7) | 0.479 | 64 (92.8) | 1501 (86.2) | 0.119 |
| - Started anti-hyperlipidemia after index IS (upon discharge**) | 46 (83.6) | 795 (82.0) | 0.858 | 55 (93.2) | 1258 (85.5) | 0.126 |
| - Received anti-hyperlipidemia both at baseline* and upon discharge** | 37 (90.2) | 444 (87.1) | 0.807 | 9 (90.0) | 243 (90.3) | 1.000 |
| Received CCB upon discharge** | 18 (18.8) | 325 (22.0) | 0.524 | 12 (17.4) | 284 (16.3) | 0.743 |
| - Started CCB after index IS (upon discharge**) | - | - | - | - | - | - |
| - Received CCB both at baseline* and upon discharge** | 18 (18.8) | 325 (22.0) | 0.524 | 12 (17.4) | 284 (16.3) | 0.868 |
| Clinical manifestation apparent at start of first-time ischemic stroke attack: Headache | 24 (25.0) | 356 (24.7) | 0.954 | 18 (26.5) | 451 (26.3) | 0.970 |
| Clinical manifestation apparent at start of index ischemic stroke attack: Nausea and vomiting | 17 (17.7) | 248 (17.2) | 0.893 | 13 (19.1) | 261 (15.1) | 0.370 |
| Clinical manifestation apparent at start of index ischemic stroke attack: Vertigo | 13 (13.7) | 281(19.5) | 0.165 | 13 (19.1%) | 329 (19.1) | 0.996 |
| Clinical manifestation apparent at start of index ischemic stroke attack: Visual alteration | 8 (8.4) | 129 (9.0) | 0.843 | 7 (10.3) | 142 (8.3) | 0.557 |
| Clinical manifestation apparent at start of index ischemic stroke attack: Speech disturbance | 44 (45.8) | 834 (57.7) | 0.023 | 41 (60.3) | 966 (56.1) | 0.544 |
| Clinical manifestation apparent at start of index ischemic stroke attack: Hemiparesis | 67 (69.8) | 1125 (77.2) | 0.098 | 59 (88.1) | 1330 (77.1) | 0.036 |
| Total cholesterol (mmol/L), Mean (± SD) | 6.47 (±2.3) | 6.16 (±1.8) | 0.185 | 6.12 (±1.59) | 5.85 (±1.65) | 0.173 |
| Total score of NIHSS |  |  | 0.023 |  |  | 0.973 |
| - No and minor symptoms | 52 (54.2) | 612 (42.3) |  | 36 (52.2) | 912 (52.4) |  |
| - Moderate and severe symptoms | 44 (45.8) | 834 (57.7) |  | 33 (47.8) | 829 (47.6) |  |

**baseline is defined as prior to first time ischemic stroke attack; **discharge from hospital admission secondary to first time stroke attack Abbreviations; ACEIs or ARBs: angiotensin converting enzyme inhibitors or angiotensin receptor blockers; ADM: antidiabetic medications; BMI: body mass index; CCB; calcium channel blocker; DBP: diastolic blood pressure; FHOS: family history of stroke; IS: ischemic stroke; IHD: ischemic heart disease; HTN: hypertension; N: number of patients; NIHSS: National Institutes of Health Stroke Scale; OHA: oral hypoglycemic agent; SBP: systolic blood pressure; SD: standard deviation. Significance: P<0.05.*
